# Supplementary material
Source: publisher site journal article supplement (https://www.dovepress.com/article/544845)
Supplement: Supplementary file 1 [file 544845%20Supplementary%20Table%20S1.docx]

**Supplementary Table S1：A total of 148 drugs associated with AGEP**

| **DRUG** | **ROR.95.Cl.** | **PRR (χ²)** | **EBGM.EBGM05.** | **IC.IC025.** | **pvalue** | **p_adjust** | **single_factor_analysis** | **Drug Class** |
| --- | --- | --- | --- | --- | --- | --- | --- | --- |
| AMOXICILLIN | 34.76 ( 30.83 - 39.19 ) | 34.35 ( 8759.81 ) | 32.98 ( 29.83 ) | 5.04 ( 4.87 ) | 0 | 0 | YES | Antibiotic |
| CLINDAMYCIN | 49.86 ( 43.87 - 56.68 ) | 49.01 ( 11203 ) | 47.28 ( 42.48 ) | 5.56 ( 5.38 ) | 0 | 0 | YES | Antibiotic |
| IBUPROFEN | 8.5 ( 7.48 - 9.67 ) | 8.48 ( 1535.21 ) | 8.22 ( 7.38 ) | 3.04 ( 2.85 ) | 0 | 0 | YES | Analgesic/Antipyretic |
| VANCOMYCIN | 29.1 ( 25.44 - 33.3 ) | 28.81 ( 5745.11 ) | 27.92 ( 24.94 ) | 4.8 ( 4.61 ) | 0 | 0 | YES | Antibiotic |
| TERBINAFINE | 53.2 ( 45.58 - 62.09 ) | 52.22 ( 8236.82 ) | 50.97 ( 44.79 ) | 5.67 ( 5.44 ) | 4.8054E-219 | 2.6094E-216 | YES | Antifungal |
| HYDROXYCHLOROQUINE | 25.91 ( 22.02 - 30.49 ) | 25.68 ( 3481.68 ) | 25.14 ( 21.95 ) | 4.65 ( 4.41 ) | 0 | 0 | YES | Antirheumatic/Immunomodulator |
| CIPROFLOXACIN | 10.22 ( 8.64 - 12.09 ) | 10.19 ( 1136.6 ) | 10 ( 8.69 ) | 3.32 ( 3.08 ) | 3.3224E-247 | 1.8041E-244 | YES | Antibiotic |
| CEFTRIAXONE | 36.31 ( 30.57 - 43.13 ) | 35.85 ( 4453.26 ) | 35.17 ( 30.46 ) | 5.14 ( 4.88 ) | 1.013E-153 | 5.5008E-151 | YES | Antibiotic |
| LEVETIRACETAM | 6.89 ( 5.8 - 8.19 ) | 6.87 ( 650.17 ) | 6.76 ( 5.85 ) | 2.76 ( 2.5 ) | 3.6774E-142 | 1.9968E-139 | YES | Antiepileptic |
| PARACETAMOL | 3.83 ( 3.22 - 4.56 ) | 3.83 ( 262.39 ) | 3.77 ( 3.26 ) | 1.92 ( 1.66 ) | 2.08951E-58 | 1.1346E-55 | YES | Analgesic/Antipyretic |
| METRONIDAZOLE | 21.1 ( 17.7 - 25.17 ) | 20.95 ( 2369.28 ) | 20.58 ( 17.76 ) | 4.36 ( 4.11 ) | 0 | 0 | YES | Antibiotic |
| AMOXICILLIN;CLAVULANIC ACID | 21.66 ( 18.07 - 25.96 ) | 21.5 ( 2305.19 ) | 21.14 ( 18.17 ) | 4.4 ( 4.14 ) | 0 | 0 | YES | Antibiotic |
| DILTIAZEM | 34.71 ( 28.93 - 41.66 ) | 34.29 ( 3781.11 ) | 33.72 ( 28.94 ) | 5.08 ( 4.81 ) | 1.5454E-134 | 8.3916E-132 | YES | Calcium Channel Blocker |
| PANTOPRAZOLE | 9.34 ( 7.71 - 11.32 ) | 9.32 ( 774.96 ) | 9.19 ( 7.82 ) | 3.2 ( 2.92 ) | 9.0282E-169 | 4.9023E-166 | YES | Proton Pump Inhibitor |
| VALACICLOVIR | 22.09 ( 18.2 - 26.81 ) | 21.92 ( 2065.23 ) | 21.6 ( 18.37 ) | 4.43 ( 4.15 ) | 3.16117E-99 | 1.71652E-96 | YES | Antiviral |
| OMEPRAZOLE | 7.3 ( 6 - 8.87 ) | 7.28 ( 549.77 ) | 7.19 ( 6.1 ) | 2.85 ( 2.56 ) | 3.1232E-120 | 1.6959E-117 | YES | Proton Pump Inhibitor |
| ACICLOVIR | 27.72 ( 22.76 - 33.78 ) | 27.46 ( 2537.98 ) | 27.07 ( 22.95 ) | 4.76 ( 4.47 ) | 4.7777E-105 | 2.5943E-102 | YES | Antiviral |
| AZITHROMYCIN | 11 ( 9 - 13.44 ) | 10.96 ( 865.64 ) | 10.82 ( 9.14 ) | 3.44 ( 3.14 ) | 3.9206E-188 | 2.1289E-185 | NO | Antibiotic |
| SULFAMETHOXAZOLE;TRIMETHOPRIM | 21.6 ( 17.61 - 26.5 ) | 21.44 ( 1807.46 ) | 21.16 ( 17.84 ) | 4.4 ( 4.1 ) | 3.40641E-88 | 1.84968E-85 | NO | Antibiotic |
| LEVOFLOXACIN | 6.52 ( 5.28 - 8.04 ) | 6.5 ( 404.65 ) | 6.43 ( 5.39 ) | 2.69 ( 2.38 ) | 8.13054E-89 | 4.41489E-86 | NO | Antibiotic |
| ALLOPURINOL | 25.06 ( 20.26 - 30.99 ) | 24.84 ( 1966.2 ) | 24.54 ( 20.54 ) | 4.62 ( 4.31 ) | 3.97949E-87 | 2.16086E-84 | NO | Antihyperuricemic Agent |
| PHENYTOIN | 14.01 ( 11.21 - 17.49 ) | 13.94 ( 938.43 ) | 13.79 ( 11.45 ) | 3.79 ( 3.46 ) | 2.5819E-203 | 1.402E-200 | NO | Antiepileptic |
| ESOMEPRAZOLE | 3.03 ( 2.42 - 3.79 ) | 3.02 ( 103.1 ) | 3 ( 2.49 ) | 1.59 ( 1.26 ) | 8.73813E-24 | 4.7448E-21 | NO | Proton Pump Inhibitor |
| PIPERACILLIN;TAZOBACTAM | 23.28 ( 18.49 - 29.3 ) | 23.09 ( 1547.61 ) | 22.85 ( 18.85 ) | 4.51 ( 4.18 ) | 3.76959E-72 | 2.04689E-69 | NO | Antibiotic |
| AMLODIPINE | 4.01 ( 3.18 - 5.05 ) | 4 ( 162.76 ) | 3.97 ( 3.27 ) | 1.99 ( 1.65 ) | 1.25672E-36 | 6.82398E-34 | NO | Calcium Channel Blocker |
| CETIRIZINE | 6.09 ( 4.8 - 7.74 ) | 6.08 ( 285.81 ) | 6.03 ( 4.94 ) | 2.59 ( 2.24 ) | 5.03585E-63 | 2.73447E-60 | NO | Antihistamine |
| ENOXAPARIN | 9.98 ( 7.81 - 12.74 ) | 9.94 ( 518.09 ) | 9.86 ( 8.03 ) | 3.3 ( 2.94 ) | 9.1788E-113 | 4.9841E-110 | NO | Anticoagulant |
| LAMOTRIGINE | 3.4 ( 2.66 - 4.34 ) | 3.4 ( 109.08 ) | 3.38 ( 2.75 ) | 1.76 ( 1.4 ) | 5.16386E-25 | 2.80397E-22 | NO | Antiepileptic |
| BUPROPION | 4.01 ( 3.11 - 5.17 ) | 4.01 ( 134.26 ) | 3.98 ( 3.22 ) | 1.99 ( 1.62 ) | 2.1455E-30 | 1.16501E-27 | NO | Antidepressant/Smoking Cessation Aid |
| PREDNISOLONE | 4.48 ( 3.43 - 5.84 ) | 4.47 ( 147.19 ) | 4.45 ( 3.56 ) | 2.15 ( 1.76 ) | 4.00915E-33 | 2.17697E-30 | NO | Glucocorticoid |
| CARBAMAZEPINE | 6.53 ( 4.96 - 8.61 ) | 6.52 ( 236.7 ) | 6.48 ( 5.14 ) | 2.7 ( 2.29 ) | 3.19184E-52 | 1.73317E-49 | NO | Antiepileptic |
| CEFALEXIN | 31.84 ( 24.14 - 42.01 ) | 31.49 ( 1494.8 ) | 31.26 ( 24.79 ) | 4.97 ( 4.56 ) | 5.78925E-57 | 3.14356E-54 | NO | Antibiotic |
| LINEZOLID | 10.08 ( 7.61 - 13.36 ) | 10.05 ( 396.56 ) | 9.98 ( 7.89 ) | 3.32 ( 2.91 ) | 7.77951E-32 | 4.22427E-29 | NO | Antibiotic |
| FUROSEMIDE | 5.55 ( 4.18 - 7.37 ) | 5.54 ( 177.44 ) | 5.51 ( 4.34 ) | 2.46 ( 2.05 ) | 1.67814E-39 | 9.11227E-37 | NO | Diuretic |
| CLARITHROMYCIN | 7.59 ( 5.7 - 10.12 ) | 7.57 ( 266.41 ) | 7.53 ( 5.92 ) | 2.91 ( 2.49 ) | 1.79153E-58 | 9.728E-56 | NO | Antibiotic |
| TRAMADOL | 3.65 ( 2.74 - 4.87 ) | 3.65 ( 89.86 ) | 3.63 ( 2.86 ) | 1.86 ( 1.44 ) | 9.58663E-21 | 5.20554E-18 | NO | Central Analgesic |
| DOXYCYCLINE | 7.42 ( 5.51 - 9.98 ) | 7.4 ( 242.18 ) | 7.36 ( 5.74 ) | 2.88 ( 2.45 ) | 3.15038E-53 | 1.71066E-50 | NO | Antibiotic |
| ATORVASTATIN | 1.37 ( 1.01 - 1.85 ) | 1.37 ( 4.23 ) | 1.37 ( 1.06 ) | 0.45 ( 0.01 ) | 0.049055379 | 1 | NO | Lipid-lowering Agent |
| DICLOFENAC | 1.43 ( 1.05 - 1.95 ) | 1.43 ( 5.13 ) | 1.43 ( 1.1 ) | 0.51 ( 0.06 ) | 0.029910326 | 1 | NO | Analgesic/Antipyretic |
| ONDANSETRON | 8.56 ( 6.27 - 11.68 ) | 8.53 ( 264.61 ) | 8.49 ( 6.54 ) | 3.09 ( 2.63 ) | 9.14003E-24 | 4.96304E-21 | NO | Antiemetic |
| CEFAZOLIN | 54.14 ( 39.4 - 74.4 ) | 53.11 ( 1983.29 ) | 52.81 ( 40.48 ) | 5.72 ( 5.26 ) | 1.1016E-52 | 5.98169E-50 | NO | Antibiotic |
| CEFUROXIME | 16.69 ( 12.17 - 22.88 ) | 16.59 ( 568.36 ) | 16.5 ( 12.67 ) | 4.04 ( 3.59 ) | 1.48557E-33 | 8.06662E-31 | NO | Antibiotic |
| CARBOPLATIN | 2.37 ( 1.72 - 3.26 ) | 2.37 ( 29.84 ) | 2.36 ( 1.81 ) | 1.24 ( 0.77 ) | 9.42286E-08 | 5.11661E-05 | NO | Antineoplastic |
| FLUCONAZOLE | 10.57 ( 7.68 - 14.55 ) | 10.53 ( 326.24 ) | 10.48 ( 8.02 ) | 3.39 ( 2.93 ) | 8.74853E-26 | 4.75045E-23 | NO | Antifungal |
| HYDROXYZINE | 22.7 ( 16.48 - 31.27 ) | 22.52 ( 777.51 ) | 22.4 ( 17.14 ) | 4.49 ( 4.02 ) | 1.52187E-37 | 8.26377E-35 | NO | Antihistamine |
| MORPHINE | 2.73 ( 1.98 - 3.76 ) | 2.73 ( 41.4 ) | 2.72 ( 2.08 ) | 1.44 ( 0.98 ) | 2.96787E-10 | 1.61156E-07 | NO | Analgesic |
| DEXAMETHASONE | 2.26 ( 1.62 - 3.16 ) | 2.26 ( 24.53 ) | 2.26 ( 1.71 ) | 1.17 ( 0.69 ) | 1.3978E-06 | 0.000759007 | NO | Glucocorticoid |
| CEFEPIME | 47.24 ( 33.46 - 66.71 ) | 46.45 ( 1461.2 ) | 46.24 ( 34.64 ) | 5.53 ( 5.03 ) | 6.03643E-43 | 3.27778E-40 | NO | Antibiotic |
| GEMCITABINE | 3.41 ( 2.42 - 4.8 ) | 3.4 ( 55.8 ) | 3.39 ( 2.55 ) | 1.76 ( 1.27 ) | 2.68614E-13 | 1.45857E-10 | NO | Antineoplastic |
| LANSOPRAZOLE | 3.26 ( 2.32 - 4.6 ) | 3.26 ( 51.54 ) | 3.25 ( 2.44 ) | 1.7 ( 1.2 ) | 2.19087E-12 | 1.18964E-09 | NO | Proton Pump Inhibitor |
| NYSTATIN | 103.79 ( 73.25 - 147.06 ) | 100.01 ( 3220.31 ) | 99.53 ( 74.36 ) | 6.64 ( 6.13 ) | 6.50207E-54 | 3.53062E-51 | NO | Antifungal |
| BISOPROLOL | 7.43 ( 5.19 - 10.64 ) | 7.42 ( 165.84 ) | 7.39 ( 5.47 ) | 2.89 ( 2.36 ) | 1.25532E-16 | 6.8164E-14 | NO | Beta-blocker |
| IODIXANOL | 35.91 ( 25.03 - 51.52 ) | 35.46 ( 1000.49 ) | 35.3 ( 26.1 ) | 5.14 ( 4.62 ) | 9.86483E-36 | 5.3566E-33 | NO | Contrast Agent |
| OLANZAPINE | 1.7 ( 1.19 - 2.44 ) | 1.7 ( 8.64 ) | 1.7 ( 1.26 ) | 0.76 ( 0.24 ) | 0.004791656 | 1 | NO | Antipsychotic |
| CEFOTAXIME | 75.13 ( 51.57 - 109.45 ) | 73.13 ( 1984.78 ) | 72.84 ( 53.17 ) | 6.19 ( 5.64 ) | 3.55151E-42 | 1.92847E-39 | NO | Antibiotic |
| MEROPENEM | 16.16 ( 11.14 - 23.45 ) | 16.07 ( 394.25 ) | 16.01 ( 11.72 ) | 4 ( 3.46 ) | 3.3875E-24 | 1.83942E-21 | NO | Antibiotic |
| CELECOXIB | 1.8 ( 1.23 - 2.63 ) | 1.8 ( 9.58 ) | 1.8 ( 1.31 ) | 0.85 ( 0.3 ) | 0.003013827 | 1 | NO | Selective COX-2 Inhibitor |
| PIROXICAM | 62.6 ( 42.71 - 91.75 ) | 61.21 ( 1593.48 ) | 60.98 ( 44.28 ) | 5.93 ( 5.38 ) | 1.20134E-38 | 6.5233E-36 | NO | Analgesic/Antipyretic |
| RIFAMPICIN | 10.36 ( 6.99 - 15.36 ) | 10.33 ( 209.92 ) | 10.29 ( 7.41 ) | 3.36 ( 2.8 ) | 2.51101E-17 | 1.36348E-14 | NO | Antituberculosis Agent |
| VALPROIC ACID | 1.97 ( 1.33 - 2.92 ) | 1.97 ( 11.95 ) | 1.97 ( 1.42 ) | 0.98 ( 0.41 ) | 0.000911941 | 0.495184041 | NO | Antiepileptic/Mood Stabilizer |
| ERYTHROMYCIN | 12.23 ( 8.18 - 18.28 ) | 12.18 ( 245.53 ) | 12.14 ( 8.68 ) | 3.6 ( 3.02 ) | 2.84082E-18 | 1.54257E-15 | NO | Antibiotic |
| IOVERSOL | 18.74 ( 12.53 - 28.01 ) | 18.61 ( 398.77 ) | 18.55 ( 13.25 ) | 4.21 ( 3.63 ) | 2.02188E-22 | 1.09788E-19 | NO | Contrast Agent |
| METHYLPREDNISOLONE | 2.59 ( 1.73 - 3.87 ) | 2.59 ( 23.3 ) | 2.58 ( 1.85 ) | 1.37 ( 0.79 ) | 3.1258E-06 | 0.001697309 | NO | Glucocorticoid |
| PAROXETINE | 1.66 ( 1.11 - 2.49 ) | 1.66 ( 6.34 ) | 1.66 ( 1.19 ) | 0.73 ( 0.15 ) | 0.017022133 | 1 | NO | Antidepressant |
| AMPICILLIN;SULBACTAM | 49.02 ( 32.44 - 74.1 ) | 48.17 ( 1059.28 ) | 48.01 ( 33.98 ) | 5.59 ( 4.99 ) | 8.69458E-31 | 4.72116E-28 | NO | Antibiotic |
| CILASTATIN;IMIPENEM | 14.44 ( 9.49 - 21.97 ) | 14.37 ( 272.85 ) | 14.33 ( 10.08 ) | 3.84 ( 3.24 ) | 2.38594E-18 | 1.29557E-15 | NO | Antibiotic |
| SPIRONOLACTONE | 6.62 ( 4.31 - 10.16 ) | 6.6 ( 99.61 ) | 6.59 ( 4.6 ) | 2.72 ( 2.1 ) | 3.39713E-11 | 1.84464E-08 | NO | Potassium-sparing Diuretic |
| HYDROCHLOROTHIAZIDE;LOSARTAN | 15.7 ( 10 - 24.66 ) | 15.62 ( 259.33 ) | 15.58 ( 10.68 ) | 3.96 ( 3.31 ) | 1.05247E-16 | 5.71493E-14 | NO | Antihypertensive |
| IOHEXOL | 8.03 ( 5.12 - 12.61 ) | 8.01 ( 116.36 ) | 7.99 ( 5.48 ) | 3 ( 2.35 ) | 1.15728E-11 | 6.28402E-09 | NO | Contrast Agent |
| IRON | 3.11 ( 1.98 - 4.87 ) | 3.1 ( 27.02 ) | 3.1 ( 2.12 ) | 1.63 ( 0.98 ) | 5.85304E-07 | 0.00031782 | NO | Iron Supplement |
| AMIODARONE | 2.45 ( 1.54 - 3.88 ) | 2.44 ( 15.33 ) | 2.44 ( 1.66 ) | 1.29 ( 0.62 ) | 0.000190843 | 0.103627898 | NO | Antiarrhythmic |
| DAPTOMYCIN | 5.54 ( 3.49 - 8.81 ) | 5.53 ( 66.7 ) | 5.52 ( 3.75 ) | 2.47 ( 1.8 ) | 1.21641E-08 | 6.60513E-06 | NO | Antibiotic |
| SIMVASTATIN | 1.74 ( 1.09 - 2.76 ) | 1.74 ( 5.62 ) | 1.74 ( 1.18 ) | 0.8 ( 0.13 ) | 0.026749382 | 1 | NO | Lipid-lowering Agent |
| OFLOXACIN | 26.86 ( 16.65 - 43.33 ) | 26.6 ( 418.01 ) | 26.54 ( 17.79 ) | 4.73 ( 4.05 ) | 7.21337E-19 | 3.91686E-16 | NO | Antibiotic |
| KETOPROFEN | 32.41 ( 19.79 - 53.1 ) | 32.04 ( 480.24 ) | 31.97 ( 21.16 ) | 5 ( 4.29 ) | 4.18308E-19 | 2.27141E-16 | NO | Analgesic/Antipyretic |
| LOPERAMIDE | 3.24 ( 1.99 - 5.3 ) | 3.24 ( 24.73 ) | 3.24 ( 2.15 ) | 1.69 ( 0.99 ) | 6.01676E-05 | 0.032670998 | NO | Antidiarrheal |
| PEMETREXED | 3.42 ( 2.09 - 5.58 ) | 3.41 ( 27.25 ) | 3.41 ( 2.26 ) | 1.77 ( 1.07 ) | 3.2966E-05 | 0.017900518 | NO | Antineoplastic |
| NIFEDIPINE | 7.64 ( 4.6 - 12.7 ) | 7.63 ( 86.2 ) | 7.61 ( 4.98 ) | 2.93 ( 2.2 ) | 3.10685E-09 | 1.68702E-06 | NO | Calcium Channel Blocker |
| RAMIPRIL | 2.3 ( 1.39 - 3.83 ) | 2.3 ( 11.04 ) | 2.3 ( 1.51 ) | 1.2 ( 0.48 ) | 0.001764378 | 0.95805722 | NO | ACE Inhibitor |
| SULFASALAZINE | 5.4 ( 3.25 - 8.97 ) | 5.39 ( 53.6 ) | 5.39 ( 3.52 ) | 2.43 ( 1.71 ) | 2.63467E-07 | 0.000143062 | NO | Anti-inflammatory |
| PROPOFOL | 4.53 ( 2.63 - 7.82 ) | 4.53 ( 35.68 ) | 4.52 ( 2.87 ) | 2.18 ( 1.4 ) | 1.02841E-05 | 0.005584252 | NO | Anesthetic |
| AMPICILLIN | 25.76 ( 14.58 - 45.5 ) | 25.53 ( 282.4 ) | 25.48 ( 15.83 ) | 4.67 ( 3.87 ) | 1.51875E-13 | 8.2468E-11 | NO | Antibiotic |
| BETAMETHASONE | 6.09 ( 3.45 - 10.73 ) | 6.08 ( 50.81 ) | 6.07 ( 3.77 ) | 2.6 ( 1.8 ) | 1.20179E-06 | 0.000652573 | NO | Glucocorticoid |
| FAMOTIDINE | 4.91 ( 2.79 - 8.65 ) | 4.9 ( 37.23 ) | 4.9 ( 3.05 ) | 2.29 ( 1.49 ) | 1.02556E-05 | 0.005568813 | NO | H2 Receptor Antagonist |
| ATENOLOL | 3.19 ( 1.76 - 5.76 ) | 3.19 ( 16.48 ) | 3.18 ( 1.94 ) | 1.67 ( 0.84 ) | 0.000916195 | 0.497493679 | NO | Beta-blocker |
| AZATHIOPRINE | 5.02 ( 2.78 - 9.08 ) | 5.01 ( 35.31 ) | 5.01 ( 3.05 ) | 2.32 ( 1.49 ) | 1.92729E-05 | 0.010465175 | NO | Immunosuppressant |
| DESLORATADINE | 13.18 ( 7.28 - 23.84 ) | 13.12 ( 122.99 ) | 13.1 ( 7.98 ) | 3.71 ( 2.88 ) | 1.65674E-09 | 8.99609E-07 | NO | Antihistamine |
| CEFPODOXIME | 54.06 ( 28.9 - 101.14 ) | 53.02 ( 509.85 ) | 52.95 ( 31.35 ) | 5.73 ( 4.85 ) | 1.22361E-14 | 6.64422E-12 | NO | Antibiotic |
| DARUNAVIR | 7.09 ( 3.81 - 13.18 ) | 7.07 ( 52.05 ) | 7.06 ( 4.2 ) | 2.82 ( 1.95 ) | 2.45542E-06 | 0.001333292 | NO | Antiviral |
| GALANTAMINE | 8.94 ( 4.8 - 16.64 ) | 8.91 ( 70.16 ) | 8.9 ( 5.29 ) | 3.15 ( 2.28 ) | 3.14427E-07 | 0.000170734 | NO | Alzheimer's Therapy |
| BENDAMUSTINE | 2.28 ( 1.14 - 4.57 ) | 2.28 ( 5.77 ) | 2.28 ( 1.28 ) | 1.19 ( 0.23 ) | 0.026874728 | 1 | NO | Antineoplastic |
| CEFTAZIDIME | 21.57 ( 10.75 - 43.28 ) | 21.41 ( 155.54 ) | 21.39 ( 11.95 ) | 4.42 ( 3.45 ) | 6.6265E-09 | 3.59819E-06 | NO | Antibiotic |
| ECONAZOLE | 94.59 ( 46.72 - 191.5 ) | 91.43 ( 714.97 ) | 91.33 ( 50.61 ) | 6.51 ( 5.53 ) | 7.05024E-14 | 3.82828E-11 | NO | Antifungal |
| ERTAPENEM | 6.9 ( 3.44 - 13.81 ) | 6.88 ( 40.17 ) | 6.87 ( 3.84 ) | 2.78 ( 1.82 ) | 2.96148E-05 | 0.016080815 | NO | Antibiotic |
| ISONIAZID | 8.1 ( 4.04 - 16.22 ) | 8.08 ( 49.58 ) | 8.07 ( 4.51 ) | 3.01 ( 2.05 ) | 9.5245E-06 | 0.005171803 | NO | Antituberculosis Agent |
| PROPAFENONE | 9.61 ( 4.8 - 19.25 ) | 9.58 ( 61.42 ) | 9.57 ( 5.35 ) | 3.26 ( 2.29 ) | 2.78932E-06 | 0.0015146 | NO | Antiarrhythmic |
| AMIKACIN | 3.18 ( 1.51 - 6.67 ) | 3.18 ( 10.43 ) | 3.17 ( 1.71 ) | 1.67 ( 0.64 ) | 0.007534533 | 1 | NO | Antibiotic |
| CEFIXIME | 42.02 ( 19.91 - 88.68 ) | 41.39 ( 275.73 ) | 41.35 ( 22.13 ) | 5.37 ( 4.34 ) | 6.50606E-10 | 3.53279E-07 | NO | Antibiotic |
| ENFORTUMAB VEDOTIN | 6.11 ( 2.91 - 12.84 ) | 6.1 ( 29.83 ) | 6.1 ( 3.28 ) | 2.61 ( 1.59 ) | 0.000191659 | 0.104071085 | NO | Antineoplastic |
| OXACILLIN | 64.68 ( 30.55 - 136.92 ) | 63.19 ( 428.18 ) | 63.13 ( 33.7 ) | 5.98 ( 4.95 ) | 3.45641E-11 | 1.87683E-08 | NO | Antibiotic |
| TORASEMIDE | 9.1 ( 4.33 - 19.12 ) | 9.07 ( 50.26 ) | 9.07 ( 4.87 ) | 3.18 ( 2.16 ) | 1.64102E-05 | 0.008910713 | NO | Diuretic |
| CODEINE;PARACETAMOL | 5.18 ( 2.33 - 11.55 ) | 5.18 ( 20.21 ) | 5.17 ( 2.65 ) | 2.37 ( 1.28 ) | 0.00125931 | 0.683805089 | NO | Analgesic |
| DALTEPARIN | 5.73 ( 2.57 - 12.77 ) | 5.72 ( 23.35 ) | 5.71 ( 2.92 ) | 2.51 ( 1.42 ) | 0.000759954 | 0.412655062 | NO | Anticoagulant |
| FENOFIBRATE | 2.76 ( 1.24 - 6.16 ) | 2.76 ( 6.74 ) | 2.76 ( 1.41 ) | 1.46 ( 0.37 ) | 0.023651629 | 1 | NO | Lipid-lowering Agent |
| FONDAPARINUX | 2.75 ( 1.23 - 6.12 ) | 2.75 ( 6.66 ) | 2.74 ( 1.4 ) | 1.46 ( 0.36 ) | 0.024216846 | 1 | NO | Anticoagulant |
| FOSFOMYCIN | 19.69 ( 8.82 - 43.96 ) | 19.55 ( 105.56 ) | 19.53 ( 9.97 ) | 4.29 ( 3.19 ) | 8.80733E-07 | 0.000478238 | NO | Antibiotic |
| GENTAMICIN | 6.68 ( 3 - 14.88 ) | 6.66 ( 28.87 ) | 6.66 ( 3.4 ) | 2.74 ( 1.64 ) | 0.000343683 | 0.186619624 | NO | Antibiotic |
| GRISEOFULVIN | 134.22 ( 59.11 - 304.79 ) | 127.93 ( 755.25 ) | 127.82 ( 64.35 ) | 7 ( 5.88 ) | 1.26577E-11 | 6.87314E-09 | NO | Antifungal |
| MELOXICAM | 2.91 ( 1.31 - 6.49 ) | 2.91 ( 7.52 ) | 2.91 ( 1.49 ) | 1.54 ( 0.45 ) | 0.018885476 | 1 | NO | Analgesic/Antipyretic |
| NITROFURANTOIN | 3.45 ( 1.55 - 7.68 ) | 3.44 ( 10.39 ) | 3.44 ( 1.76 ) | 1.78 ( 0.69 ) | 0.008964188 | 1 | NO | Antibiotic |
| VERAPAMIL | 2.31 ( 1.04 - 5.14 ) | 2.31 ( 4.44 ) | 2.31 ( 1.18 ) | 1.21 ( 0.11 ) | 0.049097394 | 1 | NO | Calcium Channel Blocker |
| ACARBOSE | 10.27 ( 4.26 - 24.72 ) | 10.23 ( 41.63 ) | 10.22 ( 4.9 ) | 3.35 ( 2.17 ) | 0.000154271 | 0.083769005 | NO | Antidiabetic |
| ATOVAQUONE | 11.47 ( 4.76 - 27.61 ) | 11.42 ( 47.54 ) | 11.42 ( 5.47 ) | 3.51 ( 2.33 ) | 9.26686E-05 | 0.050319058 | NO | Antiparasitic |
| CASPOFUNGIN | 5.84 ( 2.43 - 14.05 ) | 5.83 ( 20.01 ) | 5.83 ( 2.8 ) | 2.54 ( 1.36 ) | 0.001901507 | 1 | NO | Antifungal |
| CEFDINIR | 6.3 ( 2.62 - 15.15 ) | 6.29 ( 22.22 ) | 6.28 ( 3.01 ) | 2.65 ( 1.47 ) | 0.001373365 | 0.745737429 | NO | Antibiotic |
| CEFPROZIL | 39.8 ( 16.45 - 96.27 ) | 39.24 ( 186.25 ) | 39.21 ( 18.73 ) | 5.29 ( 4.1 ) | 2.45469E-07 | 0.00013329 | NO | Antibiotic |
| ETODOLAC | 21.41 ( 8.88 - 51.64 ) | 21.25 ( 96.46 ) | 21.24 ( 10.17 ) | 4.41 ( 3.22 ) | 4.88134E-06 | 0.002650567 | NO | Analgesic/Antipyretic |
| HYDROCHLOROTHIAZIDE;IRBESARTAN | 4.48 ( 1.86 - 10.77 ) | 4.47 ( 13.47 ) | 4.47 ( 2.14 ) | 2.16 ( 0.98 ) | 0.005810745 | 1 | NO | Antihypertensive |
| IVERMECTIN | 3.84 ( 1.6 - 9.24 ) | 3.84 ( 10.49 ) | 3.84 ( 1.84 ) | 1.94 ( 0.76 ) | 0.010744535 | 1 | NO | Antiparasitic |
| METRONIDAZOLE;SPIRAMYCIN | 157.35 ( 63.85 - 387.79 ) | 148.76 ( 733.58 ) | 148.66 ( 69.89 ) | 7.22 ( 6 ) | 3.11971E-10 | 1.694E-07 | NO | Antibiotic Combination |
| NICARDIPINE | 16 ( 6.64 - 38.54 ) | 15.91 ( 69.82 ) | 15.9 ( 7.62 ) | 3.99 ( 2.81 ) | 1.9534E-05 | 0.010606942 | NO | Calcium Channel Blocker |
| NORFLOXACIN | 40.27 ( 16.65 - 97.42 ) | 39.7 ( 188.55 ) | 39.67 ( 18.94 ) | 5.31 ( 4.12 ) | 2.3177E-07 | 0.000125851 | NO | Antibiotic |
| ATOVAQUONE;PROGUANIL | 5.61 ( 2.1 - 14.95 ) | 5.6 ( 15.09 ) | 5.59 ( 2.46 ) | 2.48 ( 1.19 ) | 0.006179801 | 1 | NO | Antimalarial |
| BISMUTH;METRONIDAZOLE;TETRACYCLINE | 11.42 ( 4.28 - 30.49 ) | 11.37 ( 37.84 ) | 11.37 ( 5 ) | 3.51 ( 2.21 ) | 0.000480007 | 0.260643977 | NO | Anti-Helicobacter pylori Combination |
| CEFACLOR | 29.25 ( 10.92 - 78.38 ) | 28.95 ( 107.92 ) | 28.94 ( 12.69 ) | 4.85 ( 3.56 ) | 1.34127E-05 | 0.00728312 | NO | Antibiotic |
| CEFADROXIL | 35.84 ( 13.36 - 96.15 ) | 35.39 ( 133.63 ) | 35.37 ( 15.49 ) | 5.14 ( 3.84 ) | 6.11013E-06 | 0.003317798 | NO | Antibiotic |
| DORIPENEM | 22.41 ( 8.37 - 59.97 ) | 22.23 ( 81.1 ) | 22.22 ( 9.75 ) | 4.47 ( 3.18 ) | 3.74408E-05 | 0.020330336 | NO | Antibiotic |
| EPINEPHRINE;LIDOCAINE | 4.8 ( 1.8 - 12.81 ) | 4.8 ( 12.02 ) | 4.79 ( 2.11 ) | 2.26 ( 0.97 ) | 0.010432071 | 1 | NO | Local Anesthetic and Vasoconstrictor Combination |
| EPLERENONE | 5.3 ( 1.99 - 14.15 ) | 5.29 ( 13.93 ) | 5.29 ( 2.33 ) | 2.4 ( 1.11 ) | 0.007470386 | 1 | NO | Potassium-sparing Diuretic |
| FEXOFENADINE;PSEUDOEPHEDRINE | 2.98 ( 1.12 - 7.95 ) | 2.98 ( 5.26 ) | 2.98 ( 1.31 ) | 1.57 ( 0.28 ) | 0.04743762 | 1 | NO | Antihistamine + Decongestant Combination |
| FIDAXOMICIN | 7.62 ( 2.86 - 20.34 ) | 7.6 ( 22.94 ) | 7.6 ( 3.34 ) | 2.93 ( 1.63 ) | 0.002098828 | 1 | NO | Antibiotic |
| IOPAMIDOL | 3.34 ( 1.25 - 8.91 ) | 3.34 ( 6.55 ) | 3.34 ( 1.47 ) | 1.74 ( 0.45 ) | 0.033610409 | 1 | NO | Contrast Agent |
| MIDODRINE | 15.08 ( 5.64 - 40.29 ) | 15 ( 52.24 ) | 14.99 ( 6.59 ) | 3.91 ( 2.61 ) | 0.000169507 | 0.09204233 | NO | Vasopressor |
| PARACETAMOL;TRAMADOL | 3.01 ( 1.13 - 8.03 ) | 3.01 ( 5.37 ) | 3.01 ( 1.32 ) | 1.59 ( 0.3 ) | 0.04604766 | 1 | NO | Analgesic |
| PENTOXIFYLLINE | 22.36 ( 8.36 - 59.85 ) | 22.19 ( 80.92 ) | 22.18 ( 9.73 ) | 4.47 ( 3.17 ) | 3.77391E-05 | 0.020492335 | NO | Microcirculation Enhancer |
| PYRAZINAMIDE | 29.82 ( 11.13 - 79.9 ) | 29.5 ( 110.13 ) | 29.49 ( 12.93 ) | 4.88 ( 3.58 ) | 1.24582E-05 | 0.006764817 | NO | Antituberculosis Agent |
| SEVOFLURANE | 2.96 ( 1.11 - 7.89 ) | 2.96 ( 5.17 ) | 2.95 ( 1.3 ) | 1.56 ( 0.27 ) | 0.048613517 | 1 | NO | Inhalational Anesthetic |
| ALENDRONIC ACID;COLECALCIFEROL | 6.26 ( 2.02 - 19.45 ) | 6.25 ( 13.23 ) | 6.25 ( 2.42 ) | 2.64 ( 1.2 ) | 0.01290213 | 1 | NO | Osteoporosis Therapy |
| ALFUZOSIN | 3.94 ( 1.27 - 12.24 ) | 3.94 ( 6.58 ) | 3.94 ( 1.53 ) | 1.98 ( 0.53 ) | 0.042044863 | 1 | NO | Alpha-blocker |
| ATRACURIUM | 14.55 ( 4.68 - 45.25 ) | 14.47 ( 37.63 ) | 14.47 ( 5.6 ) | 3.85 ( 2.41 ) | 0.001266658 | 0.68779534 | NO | Muscle Relaxant |
| CLAVULANIC ACID;TICARCILLIN | 60.57 ( 19.29 - 190.25 ) | 59.27 ( 171.85 ) | 59.25 ( 22.74 ) | 5.89 ( 4.42 ) | 2.03888E-05 | 0.011071117 | NO | Antibiotic |
| FOSPHENYTOIN | 9.45 ( 3.04 - 29.36 ) | 9.42 ( 22.58 ) | 9.42 ( 3.65 ) | 3.24 ( 1.79 ) | 0.004239963 | 1 | NO | Antiepileptic |
| ISONIAZID;PYRAZINAMIDE;RIFAMPICIN | 26.27 ( 8.42 - 81.92 ) | 26.03 ( 72.19 ) | 26.01 ( 10.04 ) | 4.7 ( 3.25 ) | 0.000232327 | 0.126153454 | NO | Antituberculosis Agent |
| LABETALOL | 6.67 ( 2.15 - 20.73 ) | 6.66 ( 14.43 ) | 6.66 ( 2.58 ) | 2.74 ( 1.29 ) | 0.010893716 | 1 | NO | Alpha/Beta-blocker |
| LINCOMYCIN | 67.64 ( 21.51 - 212.75 ) | 66.02 ( 192.08 ) | 65.99 ( 25.3 ) | 6.04 ( 4.58 ) | 1.47751E-05 | 0.008022866 | NO | Antibiotic |
| NOREPINEPHRINE | 4.75 ( 1.53 - 14.74 ) | 4.74 ( 8.86 ) | 4.74 ( 1.84 ) | 2.25 ( 0.8 ) | 0.02644367 | 1 | NO | Vasopressor |
| PENTOSTATIN | 21.82 ( 7 - 67.98 ) | 21.65 ( 59.09 ) | 21.64 ( 8.36 ) | 4.44 ( 2.99 ) | 0.0003971 | 0.21562535 | NO | Antineoplastic |
| SOFT SOAP | 52.71 ( 16.81 - 165.27 ) | 51.72 ( 149.21 ) | 51.7 ( 19.87 ) | 5.69 ( 4.23 ) | 3.06023E-05 | 0.016617032 | NO | Topical Cleanser |
